# Supplementary material
Source: Springer Nature journal article supplement (https://www.springermedizin.de/resource/supplementary/12885_2012_3881_MOESM3_ESM.pdf/9464634)

ALL neuroblastoma samples, n=34

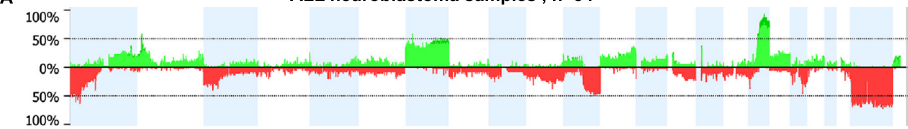

NMA, n=14

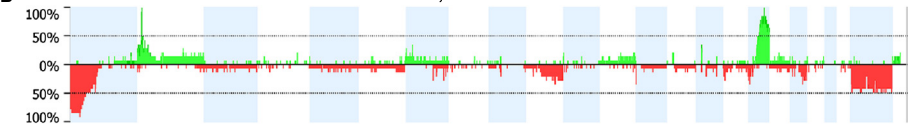

11q-, n=12

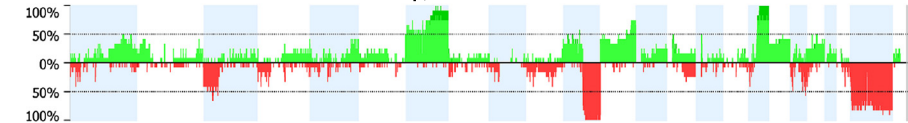

Not NMA, Not 11q-, n=6

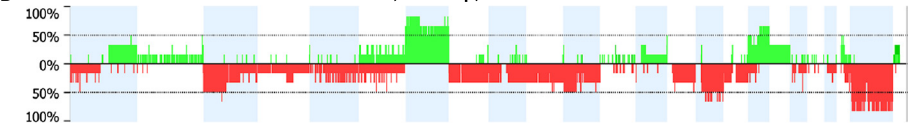

Significant Copy Number differences, 11q- vs NMA groups (Fisher's Exact Test)

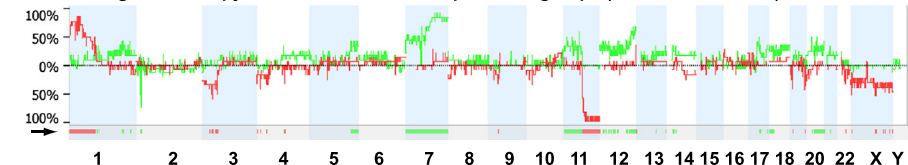

Supplement: MOESM3 [file 9464634]
